# Supplementary figures and images for: Takotsubo Syndrome during Pertuzumab and Trastuzumab Therapy for HER2-Positive Metastatic Breast Cancer
Source: MDPI journal article supplement (doi:10.3390/biomedicines12010179), 2024-01-14

Figure S1. Flow chart of the methodology.

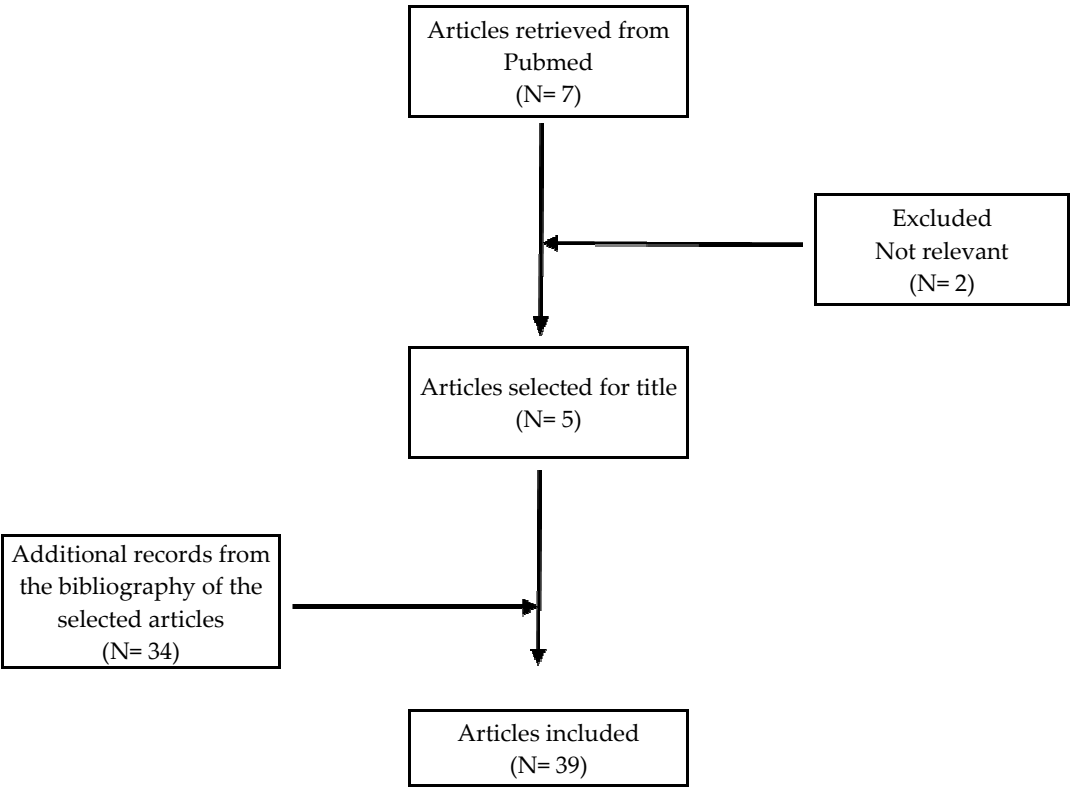

Supplement: s1 [file s1]
